# Supplementary material for: Exosome-based cancer vaccine for prevention of lung cancer
Source: PubMed Central journal article supplement — Stem Cell Investig. 2023 Jan 9;10:2. doi: 10.21037/sci-2022-030 (PMC9892015; doi:10.21037/sci-2022-030), 2023-01-09
Supplement: sci-10-2022-030-supplementary.pdf [file sci-10-2022-030-supplementary.pdf]

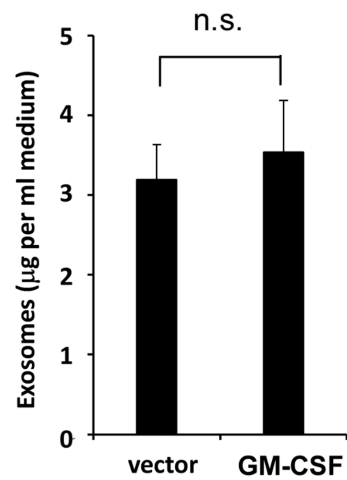

**Figure S1** Expression of GM-CSF in ES-D3 cells does not influence the production of exosomes from these cells. Exosomes were acquired from ES-D3 cells expressing the empty vector or GM-CSF. The yield of exosomes was evaluated. The data are presented as mean  $\pm$  SD of three independent ELISA experiments. n.s., not significant, Unpaired Student's *t* tests. GM-CSF, granulocyte-macrophage colony stimulating factor; ES, embryonic stem.
